# Supplementary material for: Rectified activity-dependent population plasticity implicates cortical adaptation for memory and cognitive functions
Source: PubMed Central journal article supplement — Commun Biol. 2024 Nov 11;7:1487. doi: 10.1038/s42003-024-07186-2 (PMC11555404; doi:10.1038/s42003-024-07186-2), 2024-11-11
Supplement: 42003_2024_7186_MOESM2_ESM.pdf [file 42003_2024_7186_MOESM2_ESM.pdf]

## Description Of Additional Supplementary File

**File name:** Supplementary Data 1

**Description:** The source data behind the graphs in the paper
